# Supplementary material for: NEM-Tar: A Probabilistic Graphical Model for Cancer Regulatory Network Inference and Prioritization of Potential Therapeutic Targets From Multi-Omics Data
Source: Front Genet. 2021 Apr 22;12:608042. doi: 10.3389/fgene.2021.608042 (PMC8100334; doi:10.3389/fgene.2021.608042)
Supplement: Supplementary file 2 [file Table_1.XLSX]

## Sheet: Sheet1
Table S1. A qualitative comparison between NEM-Tar and existing approaches
Methods		Input	Multi-omics	Output	Algorithm	Subtype specificity	Evaluation of causal effect of simultaneous perturbation	Programming language	References
iODA		mRNA and miRNA expression; ChIP-Seq data	Y	Pathway enrichment and consistency results	Flexibility in selection of statistical methods	N	N	Java	Yu et al., 2020
piMEM		RNA-Seq data	N	A prior incorporated graphical model	Mixture modelling	Y	N	Java	Manatakis et al., 2018
FGN		Expression data	N	A factor graph network	Message passing	N	Y	Matlab	Kotiang and Eslami, 2020
Conflux		PPI; gene sets related to a disease	N	PPI incorporated graphical model	Diffusion- based Bayesian inference	N	Y	Not given	Mezlini and Goldenberg, 2017
CBNA		RNA-Seq; miRNA-Seq; mutation	Y	miRNA-TF-mRNA network	Pearson correlation coefficient	N	N	R	Pham et al., 2019
Drivernet		RNA-Seq; mutation;etc; gene assocaition network	Y	A bipartite graph representing the aberrated genes and the outlying expression status	A greedy optimization approach	Y	N	R	Bashashati et al., 2012
SCS		RNA-Seq; mutation	Y	Consensus driver modules	RWR algorithm; random Markov sampling	Personalized	N	Matlab	Guo et al., 2018
DawnRank		Gene expression; mutation;gene association network	Y	Gene association network and the impact of genes in the network	The random walk in PageRank; Condorcet voting	Personalized	N	R	Hou and Ma, 2014
NEM-Tar		RNA-Seq; miRNA-Seq; methylation; mutation;etc.	Y	A causal interaction network among signaling genes	Nested effects-based Bayesian inference	Y	Y	R	This work
